# Supplementary material for: An in situ gelling BMSC-laden collagen/silk fibroin double network hydrogel for cartilage regeneration
Source: Royal Society of Chemistry journal article supplement (doi:10.1039/d1ma00285f), 2021-01-01
Supplement: d1ma00285f1.pdf [file d1ma00285f1.pdf]

## Supporting Information

### **An *in situ* Gelling BMSC-laden Collagen/Silk Fibroin Double Network Hydrogel for Cartilage Regeneration**

Yajie Zhang<sup>a</sup>, Liu Min<sup>\*b</sup> and Renjun Pei<sup>\*a</sup>

<sup>a</sup> CAS Key Laboratory for Nano-Bio Interface, Suzhou Institute of Nano-Tech and Nano-Bionics, Chinese Academy of Sciences, Suzhou, 215123, China

Email: rjpei2011@sinano.ac.cn

<sup>b</sup> Institute for Interdisciplinary Research, Jiangnan University, Wuhan 430056, China.

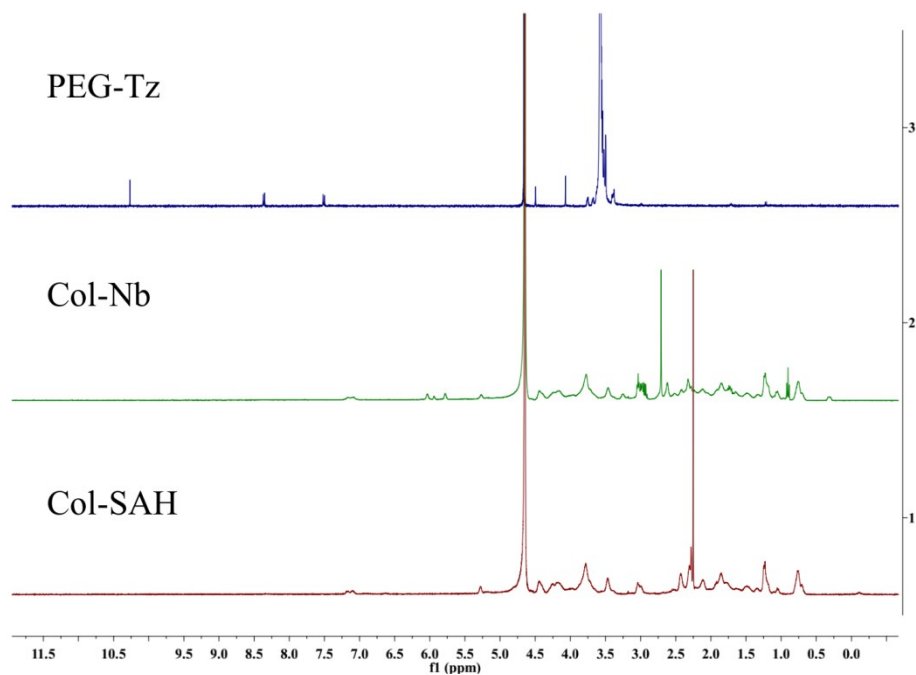

**Fig. S1** The  $^1\text{H}$  NMR spectra of Col-SAHA, Col-Nb and PEG-Tz.

**Table S1.** The compositions of different Col-PEG hydrogels.

| Hydrogels                          | Concentrations (w/v) |        |
|------------------------------------|----------------------|--------|
|                                    | PEG-Tz               | Col-Nb |
| Col <sub>1</sub> -PEG <sub>2</sub> | 3.33%                | 6.66%  |
| Col <sub>1</sub> -PEG <sub>1</sub> | 5%                   | 5%     |
| Col <sub>2</sub> -PEG <sub>1</sub> | 6.66%                | 3.33%  |

**Table S2.** The compositions of different Col-PEG/SF hydrogels.

| Hydrogels                                            | Concentrations (w/v) |        |     |
|------------------------------------------------------|----------------------|--------|-----|
|                                                      | PEG-Tz               | Col-Nb | SF  |
| PEG <sub>7.5</sub> -Col <sub>7.5</sub>               | 7.5%                 | 7.5%   | 0   |
| PEG <sub>5</sub> -Col <sub>5</sub> /SF <sub>5</sub>  | 5%                   | 5%     | 5%  |
| PEG <sub>5</sub> -Col <sub>5</sub> /SF <sub>10</sub> | 5%                   | 5%     | 10% |

**Table S3.** Primers for qRT-PCR.

| Gene   | Prime sequence           |
|--------|--------------------------|
| Col II | F-CACCGCTAACGTCCAGATGAC  |
|        | R-GGAAGGCGTGAGGTCTTCTGT  |
| AGG    | F-GGAATCCCTAGCTGCTTAGCAG |
|        | R-GAGTCATTGGAGCGAAGGTTC  |
| Sox 9  | F-AGGAAGCTGGCAGACCAGTA   |
|        | R-ACGAAGGGTCTCTTCTCGCT   |
| GAPDH  | F-TGGAGTCTACTGGCGTCTT    |
|        | R-TGTCATATTTCTCGTCCTTCA  |

**Table S4.** Modified Wakitani's histological scoring system[1]

| Category                                          | Points |
|---------------------------------------------------|--------|
| Cell morphology                                   |        |
| Hyaline cartilage                                 | 4      |
| Mostly hyaline cartilage                          | 3      |
| Mostly fibrocartilage                             | 2      |
| Mostly non-cartilage                              | 1      |
| Non-cartilage only                                | 0      |
| Matrix staining                                   |        |
| Normal                                            | 3      |
| Slightly reduced                                  | 2      |
| Markedly reduced                                  | 1      |
| No metachromatic stain                            | 0      |
| Structural integrity                              |        |
| Normal                                            | 2      |
| Slight disruption                                 | 1      |
| Severe disintegration                             | 0      |
| Surface regularity                                |        |
| Smooth (>3/4)                                     | 3      |
| Moderate (>1/2-3/4)                               | 2      |
| Irregular (1/4-1/2)                               | 1      |
| Severely irregular (<1/4)                         | 0      |
| Thickness of cartilage                            |        |
| >2/3                                              | 2      |
| 1/3-2/3                                           | 1      |
| <1/3                                              | 0      |
| Regenerated subchondral bone                      |        |
| Good                                              | 2      |
| Moderate                                          | 1      |
| Poor                                              | 0      |
| Integration of donor with host adjacent cartilage |        |
| Both edge integrated                              | 2      |
| One edge integrated                               | 1      |
| Neither edge integrated                           | 0      |
| Total maximum                                     | 18     |

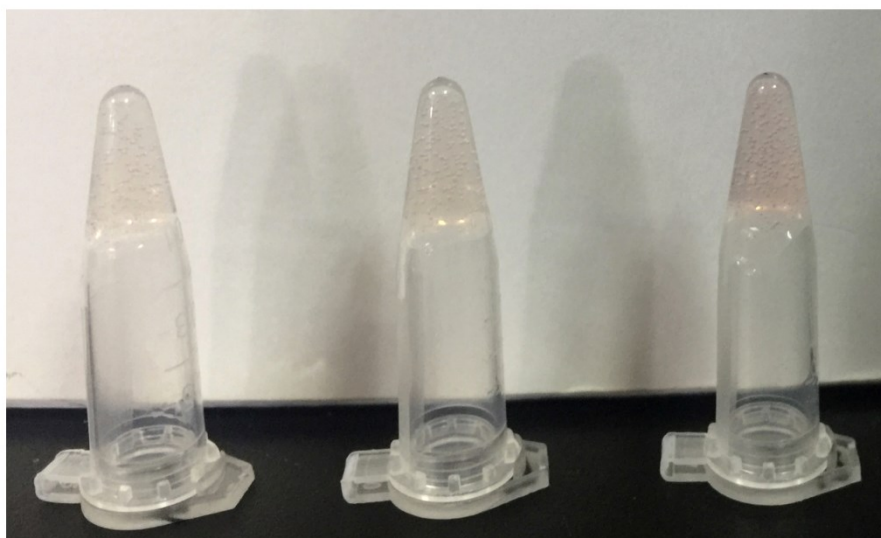

Col<sub>2</sub>-PEG<sub>1</sub>

Col<sub>1</sub>-PEG<sub>1</sub>

Col<sub>1</sub>-PEG<sub>2</sub>

**Fig. S2** Hydrogels with different Col-Nb/PEG-Tz ratios.

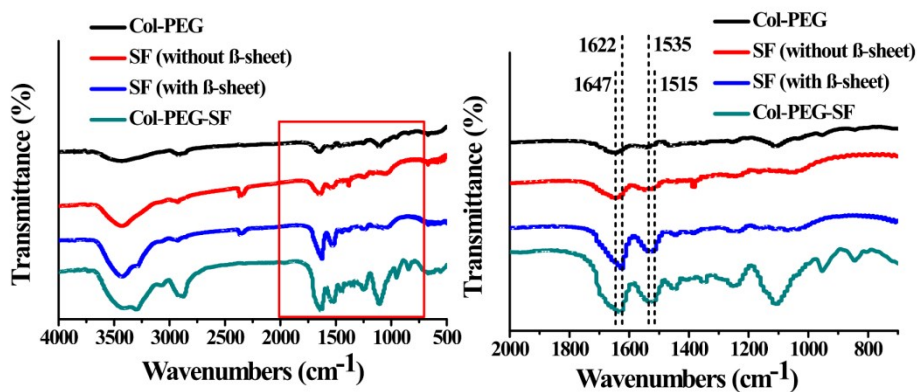

**Fig. S3** The FTIR spectra of Col-PEG hydrogel, pure SF, SF hydrogel and Col-PEG/SF hydrogel.

1. Huang, H. J.; Zhang, X.; Hu, X. Q.; Shao, Z. X.; Zhu, J. X.; Dai, L. H.; Man, Z. T.; Yuan, L.; Chen, H. F.; Zhou, C. Y.; Ao, Y. F. A functional biphasic biomaterial homing mesenchymal stem cells for in vivo cartilage regeneration. *Biomaterials* **2014**, *35*, 9608-9619.
